# Supplementary material for: Application of ensemble clustering and survival tree analysis for identifying prognostic clinicogenomic features in patients with colorectal cancer from the 100,000 Genomes Project
Source: PubMed Central journal article supplement (PMC8487486; doi:10.1186/s13104-021-05789-0), 2021-10-02
Supplement: 13104_2021_5789_MOESM1_ESM.pdf [file 13104_2021_5789_MOESM1_ESM.pdf]

### Additional file 1: Baseline characteristics of patients with colorectal cancer

| Features                                   | Alive (n = 1856) |       | Dead (n = 355) |       | Total (n = 2211) |       |
|--------------------------------------------|------------------|-------|----------------|-------|------------------|-------|
| <b>Male (%)</b>                            | 1101             | 59.3% | 218            | 61.4% | 1319             | 59.7% |
| <b>Age groups (%)</b>                      |                  |       |                |       |                  |       |
| ≤ 30                                       | 4                | 0.2%  | 0              | 0.0%  | 4                | 0.2%  |
| 31-50                                      | 155              | 8.4%  | 22             | 6.2%  | 177              | 8.0%  |
| 51-70                                      | 879              | 47.4% | 162            | 45.6% | 1041             | 47.1% |
| ≥ 71                                       | 818              | 44.1% | 171            | 48.2% | 989              | 44.7% |
| <b>Tumour stage (%)</b>                    |                  |       |                |       |                  |       |
| 1                                          | 339              | 18.3% | 22             | 6.2%  | 361              | 16.3% |
| 2                                          | 729              | 39.3% | 73             | 20.6% | 802              | 36.3% |
| 3                                          | 692              | 37.3% | 170            | 47.9% | 862              | 39.0% |
| 4                                          | 96               | 5.2%  | 90             | 25.4% | 186              | 8.4%  |
| <b>Tumour grade (%)</b>                    |                  |       |                |       |                  |       |
| 1                                          | 57               | 3.1%  | 10             | 2.8%  | 67               | 3.0%  |
| 2                                          | 1548             | 83.4% | 262            | 73.8% | 1810             | 81.9% |
| 3                                          | 251              | 13.5% | 83             | 23.4% | 334              | 15.1% |
| <b>Treatment (%)</b>                       |                  |       |                |       |                  |       |
| Surgery                                    | 1852             | 99.8% | 352            | 99.2% | 2204             | 99.7% |
| Chemotherapy                               | 830              | 44.7% | 217            | 61.1% | 1047             | 47.4% |
| Radiotherapy                               | 124              | 6.7%  | 45             | 12.7% | 169              | 7.6%  |
| Immunotherapy                              | 16               | 0.9%  | 14             | 3.9%  | 30               | 1.4%  |
| <b>Tumour mutational burden (mean, SD)</b> | 17.7             | ±35.0 | 19.4           | ±40.9 | 18.0             | ±35.9 |
| <b>KRAS mutation (%)</b>                   | 651              | 35.1% | 110            | 31.0% | 761              | 34.4% |
| <b>BRAF mutation (%)</b>                   | 590              | 31.8% | 103            | 29.0% | 693              | 31.3% |
| <b>NRAS mutation (%)</b>                   | 484              | 26.1% | 85             | 23.9% | 569              | 25.7% |
