# Supplementary material for: Application of ensemble clustering and survival tree analysis for identifying prognostic clinicogenomic features in patients with colorectal cancer from the 100,000 Genomes Project
Source: PubMed Central journal article supplement (PMC8487486; doi:10.1186/s13104-021-05789-0), 2021-10-02
Supplement: 13104_2021_5789_MOESM2_ESM.pdf [file 13104_2021_5789_MOESM2_ESM.pdf]

**Additional file 2: Hazard ratios and 95% confidence intervals for overall survival**

| Features                 | Fully adjusted hazard ratio | Lower CI | Upper CI | P value     |
|--------------------------|-----------------------------|----------|----------|-------------|
| Female                   | 0.89                        | 0.72     | 1.11     | 0.31        |
| Age                      | 1.03                        | 1.02     | 1.05     | < 0.001     |
| Stage 1 (reference)      |                             |          |          |             |
| Stage 2                  | 1.30                        | 0.80     | 2.10     | 0.29        |
| Stage 3                  | 3.20                        | 1.99     | 5.15     | < 0.001     |
| Stage 4                  | 10.20                       | 6.16     | 16.90    | < 0.001     |
| Grade 1 (reference)      |                             |          |          |             |
| Grade 2                  | 1.03                        | 0.55     | 1.96     | 0.92        |
| Grade 3                  | 1.67                        | 0.85     | 3.26     | 0.13        |
| Chemotherapy             | 1.03                        | 0.79     | 1.35     | 0.81        |
| Immunotherapy            | 1.77                        | 1.02     | 3.08     | <b>0.04</b> |
| Radiotherapy             | 1.46                        | 1.06     | 2.01     | <b>0.02</b> |
| Tumour mutational burden | 1.00                        | 1.00     | 1.01     | 0.11        |
| KRAS mutation            | 1.15                        | 0.91     | 1.45     | 0.23        |
| BRAF mutation            | 1.01                        | 0.79     | 1.28     | 0.94        |
| NRAS mutation            | 1.09                        | 0.85     | 1.40     | 0.47        |
