# Supplementary material for: Application of ensemble clustering and survival tree analysis for identifying prognostic clinicogenomic features in patients with colorectal cancer from the 100,000 Genomes Project
Source: PubMed Central journal article supplement (PMC8487486; doi:10.1186/s13104-021-05789-0), 2021-10-02
Supplement: 13104_2021_5789_MOESM3_ESM.pdf [file 13104_2021_5789_MOESM3_ESM.pdf]

**Additional file 3: Internal cluster validity indices for k = 5 and 6**

| Algorithm            | C-index      | Silhouette | Compactness | Connectivity |
|----------------------|--------------|------------|-------------|--------------|
|                      | <b>k = 5</b> |            |             |              |
| <b>PAM</b>           | 0.294        | 0.064      | 2.212       | 1064.2       |
| <b>DIANA</b>         | 0.356        | 0.103      | 2.334       | 744.8        |
| <b>Fuzzy c-means</b> | 0.147        | 0.150      | 1.909       | 495.2        |
| <b>K-means</b>       | 0.163        | 0.086      | 1.995       | 804.0        |
|                      | <b>k = 6</b> |            |             |              |
| <b>PAM</b>           | 0.274        | 0.060      | 2.160       | 1311.2       |
| <b>DIANA</b>         | 0.361        | 0.065      | 2.336       | 1022.2       |
| <b>Fuzzy c-means</b> | 0.154        | 0.113      | 1.905       | 682.6        |
| <b>K-means</b>       | 0.179        | 0.087      | 1.964       | 897.7        |
