# Supplementary material for: Application of ensemble clustering and survival tree analysis for identifying prognostic clinicogenomic features in patients with colorectal cancer from the 100,000 Genomes Project
Source: PubMed Central journal article supplement (PMC8487486; doi:10.1186/s13104-021-05789-0), 2021-10-02
Supplement: 13104_2021_5789_MOESM4_ESM.pdf [file 13104_2021_5789_MOESM4_ESM.pdf]

#### Additional file 4: Internal cluster validity indices for k = 4

| Algorithm     | C-index | Silhouette | Compactness | Connectivity |
|---------------|---------|------------|-------------|--------------|
| PAM           | 0.301   | 0.077      | 2.239       | 860.7        |
| DIANA         | 0.368   | 0.045      | 2.360       | 1048.8       |
| Fuzzy c-means | 0.140   | 0.165      | 1.988       | 467.5        |
| K-means       | 0.150   | 0.151      | 2.006       | 607.7        |
| Ensemble      | 0.139   | 0.168      | 1.991       | 427.7        |
