# Supplementary material for: Application of ensemble clustering and survival tree analysis for identifying prognostic clinicogenomic features in patients with colorectal cancer from the 100,000 Genomes Project
Source: PubMed Central journal article supplement (PMC8487486; doi:10.1186/s13104-021-05789-0), 2021-10-02
Supplement: 13104_2021_5789_MOESM5_ESM.pdf [file 13104_2021_5789_MOESM5_ESM.pdf]

**Additional file 5: Clinicogenomic features after ensemble clustering**

|                                            | Cluster 1 (n = 1001) |       | Cluster 2 (n = 702) |       | Cluster 3 (n = 230) |       | Cluster 4 (n = 278) |       |
|--------------------------------------------|----------------------|-------|---------------------|-------|---------------------|-------|---------------------|-------|
| <b>Male (%)</b>                            | 581                  | 58.0% | 484                 | 68.9% | 116                 | 50.4% | 138                 | 49.6% |
| <b>Age groups (%)</b>                      |                      |       |                     |       |                     |       |                     |       |
| ≤ 30                                       | 3                    | 0.3%  | 1                   | 0.1%  | 0                   | 0.0%  | 0                   | 0.0%  |
| 31-50                                      | 79                   | 7.9%  | 83                  | 11.8% | 0                   | 0.0%  | 15                  | 5.4%  |
| 51-70                                      | 383                  | 38.3% | 487                 | 69.4% | 9                   | 3.9%  | 161                 | 57.9% |
| ≥ 71                                       | 536                  | 53.5% | 131                 | 18.7% | 221                 | 96.1% | 102                 | 36.7% |
| <b>Tumour stage (%)</b>                    |                      |       |                     |       |                     |       |                     |       |
| 1                                          | 193                  | 19.3% | 71                  | 10.1% | 0                   | 0.0%  | 97                  | 34.9% |
| 2                                          | 499                  | 49.9% | 155                 | 22.1% | 20                  | 8.7%  | 128                 | 46.0% |
| 3                                          | 245                  | 24.5% | 402                 | 57.3% | 181                 | 78.7% | 34                  | 12.2% |
| 4                                          | 64                   | 6.4%  | 74                  | 10.5% | 29                  | 12.6% | 19                  | 6.8%  |
| <b>Tumour grade (%)</b>                    |                      |       |                     |       |                     |       |                     |       |
| 1                                          | 28                   | 2.8%  | 26                  | 3.7%  | 6                   | 2.6%  | 7                   | 2.5%  |
| 2                                          | 786                  | 78.5% | 606                 | 86.3% | 173                 | 75.2% | 245                 | 88.1% |
| 3                                          | 187                  | 18.7% | 70                  | 10.0% | 51                  | 22.2% | 26                  | 9.4%  |
| <b>Treatment (%)</b>                       |                      |       |                     |       |                     |       |                     |       |
| <b>Chemotherapy</b>                        | 296                  | 29.6% | 528                 | 75.2% | 146                 | 63.5% | 77                  | 27.7% |
| <b>Radiotherapy</b>                        | 38                   | 3.8%  | 78                  | 11.1% | 29                  | 12.6% | 24                  | 8.6%  |
| <b>Immunotherapy</b>                       | 10                   | 1.0%  | 10                  | 1.4%  | 5                   | 2.2%  | 5                   | 1.8%  |
| <b>Tumour mutational burden (mean, SD)</b> | 32.3                 | ±47.8 | 4.4                 | ±7.3  | 11.9                | ±22.2 | 5.27                | ±7.8  |
| <b>KRAS mutation (%)</b>                   | 144                  | 14.4% | 335                 | 47.7% | 114                 | 49.6% | 169                 | 60.8% |
| <b>BRAF mutation (%)</b>                   | 169                  | 16.9% | 273                 | 38.9% | 97                  | 42.2% | 155                 | 55.8% |
| <b>NRAS mutation (%)</b>                   | 95                   | 9.5%  | 229                 | 32.6% | 73                  | 31.7% | 152                 | 54.7% |
| <b>1-year survival</b>                     | 95.7%                |       | 98.7%               |       | 87.8%               |       | 96.8%               |       |
| <b>2-year survival</b>                     | 90.4%                |       | 96.7%               |       | 70.0%               |       | 90.6%               |       |
| <b>3-year survival</b>                     | 86.5%                |       | 93.0%               |       | 53.1%               |       | 79.9%               |       |
